1 Title: Distinct neural mechanisms and temporal constraints govern a cascade of audiotactile  
2 interactions

3 Abbreviated title: Audiotactile asynchronies elicit distinct effects

4  
5 Johanna M. Zumer<sup>1,2,3</sup>, Thomas P. White<sup>1,2</sup>, Uta Noppeney<sup>1,2,3</sup>

6 <sup>1</sup>School of Psychology, University of Birmingham, Birmingham, B15 2TT, United Kingdom

7 <sup>2</sup>Centre for Computational Neuroscience and Cognitive Robotics, University of Birmingham,  
8 Birmingham, B15 2TT, United Kingdom

9 <sup>3</sup>Centre for Human Brain Health, University of Birmingham, Birmingham, B15 2TT, United  
10 Kingdom

11

12 Corresponding Author: Johanna Zumer, School of Psychology, University of Birmingham,  
13 Birmingham, B15 2TT, United Kingdom; johanna.zumer@gmail.com

14 Number of pages: 36

15 Number of figures: 6

16 Number of words in Abstract: 250

17 Number of words in Introduction: 648

18 Number of words in Discussion: 1477

19 Conflict of Interest: The authors declare no competing financial interests.

20 Acknowledgements: FP7 ERC Starting Grant multisens (U.N.) and FP7 Marie Curie

21 IntraEuropean Fellowship ISMINO (J.M.Z. and U.N.). We thank Christoph Braun and Elisa

22 Leonardelli for assistance with the tactile device and Máté Aller for assistance with EEG and  
23 stimulus setup.

24 **Abstract**

25 Synchrony is a crucial cue indicating whether sensory signals are caused by single or  
26 independent sources. In order to be integrated and produce multisensory behavioural benefits,  
27 signals must co-occur within a temporal integration window (TIW). Yet, the underlying neural  
28 determinants and mechanisms of integration across asynchronies remain unclear. This  
29 psychophysics and electroencephalography study investigated the temporal constraints of  
30 behavioural response facilitation and neural interactions for evoked response potentials (ERP),  
31 inter-trial coherence (ITC), and time-frequency (TF) power. Participants were presented with  
32 noise bursts, ‘taps to the face’, and their audiotactile (AT) combinations at seven asynchronies:  
33 0,  $\pm 20$ ,  $\pm 70$ , and  $\pm 500$  ms. Behaviourally we observed an inverted U-shape function for AT  
34 response facilitation, which was maximal for synchronous AT stimulation and declined within a  
35  $\leq 70$  ms TIW. For ERPs, we observed AT interactions at 110 ms for near-synchronous stimuli  
36 within a  $\leq 20$  ms TIW and at 400 ms within a  $\leq 70$  ms TIW consistent with behavioural response  
37 facilitation. By contrast, AT interactions for theta ITC and ERPs at 200 ms post-stimulus were  
38 selective for  $\pm 70$  ms asynchrony, potentially mediated via phase resetting. Finally, interactions  
39 for induced theta power and alpha/beta power rebound emerged at 800-1100 ms across several  
40 asynchronies including even 500 ms auditory leading asynchrony. In sum, we observed neural  
41 interactions that were confined to or extending beyond the behavioural TIW or specific for  $\pm 70$   
42 ms asynchrony. This diversity of temporal profiles and constraints demonstrates that  
43 multisensory integration unfolds in a cascade of interactions that are governed by distinct neural  
44 mechanisms.

45

46 **Significance Statement:**

47 Integrating information across audition and touch is critical for effective interactions with our  
48 environment. We are faster to swat a mosquito when we perceive a prick on the skin together  
49 with hearing the mosquito's buzzing. Importantly, we should integrate signals only when they  
50 co-occur within a temporal integration window (TIW) and are hence likely to originate from a  
51 common source. This psychophysics/electroencephalography study unravels a multitude of  
52 neural interactions governed by different temporal constraints: interactions were confined to a  
53 TIW for ERPs, specific for one particular asynchrony for inter-trial coherence, and extending  
54 beyond the behavioural TIW for induced low frequency power. This diversity of temporal  
55 profiles demonstrates that distinct neural mechanisms mediate a cascade of multisensory  
56 integration processes.

57

## 58 **Introduction**

59 Imagine sitting outside on a summer evening. Suddenly you hear a buzz and then feel a prick to  
60 your skin, as the mosquito lands. You are faster to swat it away because you first heard it  
61 coming. This faster detection of a multisensory event is known as the redundant target effect  
62 (RTE) (Miller, 1982, Diederich and Colonius, 2004, Sperdin et al., 2009) and illustrates the  
63 enormous benefits of multisensory integration.

64 Importantly, we should integrate signals only if they arise from a common source but  
65 segregate them otherwise. Synchrony is a critical cue for determining whether two signals come  
66 from a common source. Multisensory need to co-occur within a certain tolerance of asynchrony,  
67 termed a temporal integration window (TIW) (Diederich and Colonius, 2004). In particular, the  
68 RTE typically follows an inverted U-shape function (Blurton et al., 2015) that is maximal for  
69 (near)-synchronous signals and tapers off with increasing asynchrony thereby moulding the TIW.

70 Likewise, observers' perceived synchrony, the emergence of cross-modal biases, and perceptual  
71 illusions follow a similar inverted U-shape function with its exact shape varying across different  
72 behavioural measures and task-contexts (van Wassenhove et al., 2007, Megevand et al., 2013,  
73 Berger and Ehrsson, 2014, Donohue et al., 2015).

74 At the neural level, multisensory influences have been identified in terms of response  
75 enhancements and suppressions, super-additive and sub-additive interactions (Meredith and  
76 Stein, 1983, Stanford et al., 2005, Werner and Noppeney, 2010b), shortened neural response  
77 latencies (Rowland and Stein, 2007) and altered neural representations (Fetsch et al., 2011, Rohe  
78 and Noppeney, 2015, 2016). Evidence from neuroimaging, neurophysiology, and neuroanatomy  
79 has shown that multisensory influences emerge at early and late stages of neural processing  
80 (Foxye et al., 2000, Lutkenhoner et al., 2002, Murray et al., 2005, Senkowski et al., 2008, Sperdin  
81 et al., 2009, Stekelenburg and Vroomen, 2009, Mercier et al., 2013, Mercier et al., 2015) nearly  
82 ubiquitously in neocortex (Schroeder and Foxye, 2002, Ghazanfar and Schroeder, 2006, Lakatos  
83 et al., 2007, Werner and Noppeney, 2010a, Ibrahim et al., 2016, Atilgan et al., 2018). They arise  
84 already at the primary cortical level and increase progressively across the sensory processing  
85 hierarchy (Foxye and Schroeder, 2005, Bizley et al., 2007, Kayser et al., 2007, Dahl et al., 2009).  
86 This multi-stage and multi-site account of multisensory interplay raises the question of whether  
87 the myriad of multisensory influences is governed by similar neural mechanisms and temporal  
88 constraints. Further, how do those neural effects relate to the TIW defined by behavioural  
89 indices? Given previous unisensory research showing an increase in the TIW along the sensory  
90 processing hierarchy (Hasson et al., 2008, Kiebel et al., 2008), one may for instance hypothesise  
91 that early multisensory interactions are confined to narrower temporal integration windows than  
92 those occurring at later stages in higher order association cortices (Werner and Noppeney, 2011).

93 Moreover, recent neurophysiological studies suggest that multisensory interactions depend on  
94 the phase of ongoing neural oscillations and/or rely on mechanisms of phase resetting. For  
95 instance, Lakatos et al. (2007) showed that a tactile signal can reset the phase of ongoing  
96 oscillations in auditory cortices, but only for specific asynchronies.

97 The current study aims to define the temporal constraints of multisensory interactions that can  
98 be observed for evoked response potentials (ERP), inter-trial coherence (ITC), and induced  
99 power responses and relate those to the TIW derived from behavioural response facilitation.  
100 Participants were presented with brief airpuff noise bursts, ‘taps to the face’ and their  
101 audiotactile (AT) combinations at seven levels of asynchrony: 0,  $\pm 20$ ,  $\pm 70$ , and  $\pm 500$  ms. In the  
102 psychophysics study observers were instructed to respond to all A, T, and AT events in a  
103 redundant target paradigm; in the EEG study a passive stimulation design was used to avoid  
104 response confounds. We then identified multisensory influences in terms of multisensory  
105 interactions (i.e.  $AT + \text{No stimulation} \neq A + T$ ) separately for each AT asynchrony level for  
106 ERPs, ITC, and induced power responses and characterised their topography across post-  
107 stimulus time.

108

## 109 **Materials and Methods**

110 *Participants.* Twenty-five healthy, adult participants with no neurological disorder were  
111 recruited from the local university population (students as well as members of the general public)  
112 (N=25, 12 female and 13 male; aged between 18-35 years old). One participant was excluded  
113 due to an abnormal finding in the structural MRI. Two participants were excluded from the  
114 behavioural analysis, because data were not collected for all conditions. Two different  
115 participants were excluded from the EEG analysis, because insufficient EEG data were collected.

116 As a result we included 22 participants in both the behavioural and EEG analysis. They gave  
117 written informed consent and were compensated either with cash or course credit. Ethical  
118 approval for the study was given by the University of Birmingham Science, Technology,  
119 Engineering, and Mathematics Review Committee with approval number ERN\_11-0429AP22B.

120 *Stimulation.* Tactile stimulation consisted of a touch to the left side of the face with 200 ms  
121 duration. Tactile stimulation to the face was used as an ecologically valid stimulus that requires  
122 a rapid response in everyday life. We also chose stimulation to the face (in contrast to hands), as  
123 this body location does not require additional processing of being potentially crossed relative to  
124 body position, thus potentially amenable to a quicker and more automatic route. The auditory  
125 association areas that receive feed-forward (layer 4) input from somatosensory stimulation  
126 appear to be optimally stimulated by cutaneous stimulation of the head and neck (Fu et al.,  
127 2003). The left side was chosen based on previous findings that MSI is enhanced with left-side  
128 stimulation and right hemisphere involvement (Giard and Peronnet, 1999, Downar et al., 2000,  
129 Molholm et al., 2002, Hofer et al., 2013). The part of the face touched was on/near the border  
130 between the maxillary (V2) and mandibular (V3) divisions of the trigeminal cranial nerve. A  
131 fibre optic cable (part of a fibre optic system: Keyence series FS-N, Neu-Isenburg, Germany)  
132 was attached to a Lego pneumatic cylinder and driven to move by pressurised air. The tip of this  
133 cable (3 mm diameter) was positioned near the face using a flexible plastic snap-together ‘goose-  
134 neck’ pipe that was attached to an adjustable stand. The air pressure changes were controlled by  
135 a microcontroller connected via USB to the stimulus computer; communication to the  
136 microcontroller was sent via serial port commands in MATLAB (Mathworks, Inc.). The  
137 duration of the open valve (i.e. when the diode was extended forward to touch the skin) was set  
138 to 200 ms. The fibre optic cable contained a dual fibre: one fibre projected light and the other

139 was a photodiode that detected the light reflectance; from this, the reflectance dynamics  
140 confirmed the exact timing of the touch to the skin. This tactile apparatus was very similar to  
141 that used by Leonardelli et al. (2015). After the experiment, subjects were queried as to whether  
142 they could hear the tactile device moving prior to it touching them and none reported that they  
143 could.

144 The auditory stimulus (target) was an airpuff noise of 200 ms duration. The volume of the  
145 target was well above threshold for detection but not painfully loud; the volume was stronger on  
146 the left channel than on the right (interaural intensity difference) to create the perception of  
147 coming from the left. A constant background noise of a recording of a magnetic resonance  
148 imaging (MRI) echo-planar imaging sequence (obtained from  
149 <http://cubricmri.blogspot.co.uk/2012/08/scanner-sounds.html>) was played to help mask external  
150 noises including those made by the tactile stimulator and for comparison with potential future  
151 functional MRI studies. The volume of the background noise, equally loud in both ears, was  
152 played at a level comfortable to participants and such that the tactile noises could not be heard.  
153 All sounds were presented via E-A-RTone earphone (10 Ohm; E-A-R Auditory Systems) with  
154 plastic tube connection (length = 75 cm) to foam ear insert (E-A-RLink size 3A), which also  
155 acted as an earplug against external sounds.

156 *Experimental design.* Participants took part in one psychophysics and one EEG session on  
157 separate days (typically 4-6 days gap). The experimental design and stimuli were identical across  
158 the two sessions. In the psychophysics session participants responded to the first stimulus in a  
159 trial irrespective of sensory modality, as fast as possible via a single key board button (i.e.  
160 redundant target paradigm). In the EEG session, participants passively perceived the stimuli

161 without an explicit response in order to avoid motor confounds and allow for comparison with  
162 sleep, non-responsive patients, etc.

163 In each session, participants were presented with the following trial types: no stimulus (or  
164 null) condition (N), tactile alone (T), auditory alone (A), and seven audiotactile (AT) conditions  
165 varying in asynchrony (-500 ms, -70 ms, -20 ms, 0 ms, 20 ms, 70 ms, 500 ms) where a ‘negative’  
166 asynchrony refers to A-leading-T (Fig. 1a). The audiotactile conditions are referred to by the  
167 following abbreviations: AT500, AT70, AT20, AT0, TA20, TA70, TA500, respectively. These  
168 asynchronies were chosen to fall either within the behaviourally-defined temporal integration  
169 window (TIW) ( $\leq 70$  ms) based on previous studies (e.g. (Navarra et al., 2007, Harrar and Harris,  
170 2008, Nishi et al., 2014)) or outside the TIW ( $\pm 500$  ms). Ten different trial types were  
171 presented, interleaved randomly with an inter-trial interval uniformly distributed between 2.0 –  
172 3.5 s, including both unisensory and audiotactile conditions with varying asynchronies between  
173 the sensory stimuli. Each trial type was presented 100 times in each session. Trials were  
174 presented in blocks of 250 trials (roughly 11.75 minutes) over four blocks separated by short  
175 breaks. In the EEG session (performed about 1 hour before bedtime) we occasionally shortened  
176 the blocks, but still presented 1000 trials in total. In the psychophysics session the AT500 and  
177 TA500 conditions were not collected for two participants; thus for behavioural results, only the  
178 data from the remaining twenty-two participants are included (after exclusion also of one  
179 participant for the afore-mentioned structural MRI abnormality).

180 Participants kept their eyes closed to obliterate any visual input throughout the experiment.  
181 They were seated comfortably with their head stabilised in an adjustable chin rest and were  
182 requested to hold their head as still as possible (to promote spatial and temporal consistency of  
183 the tactile stimulation over trials).



184 *EEG recording.* EEG data were recorded with a 64 channel BrainProducts MR-compatible  
185 cap at 1000 Hz sampling rate, with 63 of the electrodes on the scalp. For all but the first three  
186 participants, two additional bipolar electrodes were placed on the face to record horizontal EOG  
187 and vertical EOG. For 17 participants, the 64<sup>th</sup> cap electrode was placed on the participants' back  
188 for recording ECG. For the other 8 participants, the 64<sup>th</sup> electrode was instead placed on the  
189 right (unstimulated) cheek for assistance as EOG/EMG. Signals were digitised at 5000 Hz with  
190 an anti-aliasing filter of 1000 Hz, then down-sampled to 1000 Hz with a high-pass filter of 0.1  
191 Hz and low-pass filter of 250 Hz. Electrode impedances were kept below 25 kOhm. Triggers  
192 from the stimulus-control computer were sent via LabJack to the EEG acquisition computer.

193 *Tactile stimulation output:* The time course of light reflectance was assessed for each tactile  
194 trial to ensure that i. the tactile device actually touched the skin and ii. to determine the touch  
195 onset time (1000 Hz sampling rate). After computing the actual onset of the touch from the light  
196 reflectance data, subsequently the exact multisensory onset asynchrony was computed for all  
197 multisensory trials. Those that deviated by more than  $\pm 5$  ms from the desired asynchrony were  
198 discarded. This resulted in 16.8% ( $\pm 1.1\%$ ) and 16.4% ( $\pm 1.2\%$ ) of trials rejected for the  
199 behavioural and EEG data, respectively (N=24, after excluding the participant with structural  
200 MRI abnormality).

201 *Behavioural analysis.* After exclusion of trials where touch was not applied or outside the  
202 desired asynchrony, sensory trials were additionally discarded with no response or with response  
203 times (RT) faster than 100 ms or slower than 1 s (occurring in total for an average of  $2.7 \pm 1.1\%$   
204 of trials across conditions). The median RT within a condition for each participant was  
205 computed.

206 For each participant the *redundant target effect* (Hershenson, 1962) was computed for each  
207 participant by subtracting the median RT of the AT condition at a particular level of asynchrony  
208 from the fastest A or T condition with the onset of each unisensory condition adjusted for the  
209 particular asynchrony (e.g.  $RT_{AT20} - \min(RT_T + 20 \text{ ms}, RT_A)$ ). Using a one-sample two-sided t-  
210 test we assessed whether the redundant target effect differed significantly from zero across  
211 participants.

212 *EEG analysis: sleep staging.* To ensure that only EEG data was used in which participants  
213 were awake, given the passive stimulation design with eyes closed and the evening acquisition,  
214 standard sleep scoring was performed using American Academy of Sleep medicine (AASM)  
215 2007 criteria in the FASST open-source software  
216 (<http://www.montefiore.ulg.ac.be/~phillips/FASST.html>) (Leclercq et al., 2011) and custom code  
217 in MATLAB. Data were segmented into 30 s chunks and referenced to linked-mastoids. Sleep  
218 stages were assessed by two of the authors (J.M.Z. and T.P.W.) independently with a  
219 correspondence of 88%. Differences were discussed and a consensus reached (with  
220 correspondence of the consensus to each assessor's scores at 93% and 94%). Any 30 s chunk  
221 that was not scored as 'awake' was excluded from further analysis. If an individual participant  
222 had fewer than 55 trials per condition remaining in the awake stage (prior to artefact rejection),  
223 the participant was fully excluded. Two participants were excluded for this reason.

224 *EEG analysis: preprocessing:* All subsequent EEG data processing (after sleep staging) was  
225 performed using the open-source toolbox FieldTrip (Oostenveld et al., 2011)  
226 ([www.fieldtriptoolbox.org](http://www.fieldtriptoolbox.org)) and custom code in MATLAB. Eye movement artefacts were  
227 automatically detected using three re-referenced bipolar pairs ('F7-F8', 'Fp2-FT9', and 'Fp1-  
228 FT10') and the VEOG if available. These channels' data were band-pass filtered (1-16 Hz;

229 Butterworth, order 3) and transformed to z-values. The exclusion threshold was set at a z-value  
230 of 6 and trials containing these artefacts were excluded. EEG data were re-referenced to the  
231 average reference, high-pass filtered (0.2 Hz), band-stop filtered around the line noise and its  
232 harmonics (49-51 Hz, 99-101 Hz, and 149-151 Hz), and epoched for each trial. Trials were  
233 locked to the onset of the tactile stimulus for tactile and all multisensory conditions and to the  
234 auditory or null trigger for A and N conditions, respectively. Initially, the epoch length was from  
235 -1.5 s to 2.3 s. Then A trials were shifted  $\pm 0.5$ , 0.07, 0.02, or 0 s before being added to a T trial,  
236 to create the appropriate A+T combination to contrast with AT trials, hence resulting in variable  
237 lengths of pre-stimulus and post-stimulus window lengths, depending on the AT asynchrony.

238 *EEG analysis: multisensory contrast.* Multisensory integration in the EEG data was identified  
239 in terms of AT interaction, i.e. the sum of unisensory (A+T) contrasted to the audiotactile plus  
240 null (AT+N). It is critical to add the null condition (to the multisensory) to account for non-  
241 specific effects in a trial such as expectancy of stimulation as well as random noise. The sum of  
242 unisensory (A+T) trials was computed for each AT asynchrony level such that the onsets of the  
243 auditory and tactile stimuli were exactly aligned to the trials of the AT condition (i.e. we also  
244 accounted for the jitter of tactile onsets, see above). Trials from each condition were randomly  
245 sub-selected to ensure an equal number of trials per each of the four conditions in a given  
246 contrast (A, T, AT, and N). To correct for multiple comparison (over channels, time, and, where  
247 applicable, frequency) we performed cluster-based permutation tests for dependent (i.e. paired)  
248 samples, with the sum of the t values (i.e. max sum) across a cluster as cluster-level statistic and  
249 a cluster detected at an auxiliary uncorrected alpha threshold of 0.05.

250 *EEG analysis: multisensory effects on ERP, inter-trial coherence, and time-frequency power.*  
251 For the evoked response potential (ERP) analysis, EEG data were low-pass filtered (40 Hz). The

252 average over trials within a participant was computed for the combination of conditions A+T and  
253 AT+N separately. We assessed the AT interaction separately for each asynchrony level within a  
254 500 ms time window, beginning at the onset of the second stimulus.

255 For time-frequency analysis, EEG data were Fourier transformed with separate parameters for  
256 lower (4-30 Hz) and higher (30-80 Hz) frequencies. Sliding time windows of length equal to  
257 four cycles (low frequencies) or 200 ms (high frequencies) at a given frequency in steps of 2 Hz  
258 (low frequencies) or 5 Hz (high frequencies), after application of a Hanning taper (low  
259 frequencies) or multitaper with +/- 7 Hz smoothing (high frequencies). The complex values  
260 were kept for separate analysis of the inter-trial coherence (ITC) (also referred to as phase-  
261 locking factor or phase-consistency index) and the time-frequency (TF) power magnitude. Note  
262 that the sum of trials of different condition types (i.e. A+T and AT+N) was computed prior to  
263 Fourier transformation so that any cancellation due to phase differences would occur prior to  
264 obtaining the Fourier complex value (see Senkowski et al. (2007)). The ITC was computed for  
265 each condition and subject as the absolute value of the sum of the complex values over trials. We  
266 assessed the AT interactions for ITC and TF power separately for 'low frequency' and 'high  
267 frequency' and for each asynchrony level, within a 1200 ms time window beginning at the onset  
268 of the second stimulus and extending to include the low frequency (e.g. alpha and beta)  
269 desynchronization / rebound effects.

270

## 271 **Results**

272 For the psychophysics study we report the redundant target effect as a behavioural index of  
273 audiotactile integration for each asynchrony level. For the EEG data we report the multisensory  
274 interactions ( $AT+N \neq A+T$ ) for ERPs, inter-trial coherence (ITC), and time-frequency (TF)

275 power. Both behavioural and neural indices of multisensory integration were identified  
276 separately for each of the seven levels of AT asynchrony: 0,  $\pm 20$ ,  $\pm 70$ , and  $\pm 500$  ms (Figure 1a).  
277 This allows us to investigate if the integration indices were i. limited to temporal integration  
278 windows, ii. selective for specific asynchronies, or iii. symmetric for A-leading vs. lagging  
279 asynchronies.

280

### 281 **Behavioural results: reaction time facilitation tapered by TIW**

282 As expected, we observed significantly faster (Figure 2 for p-values and t-values) response times  
283 for the AT relative to the fastest unisensory condition (i.e. *redundant target effect*) for  
284 asynchronies within a  $\leq 70$  ms window of integration (Figure 1b). Specifically, the RTEs (across  
285 subjects mean  $\pm$  SEM) for the different asynchrony levels were: AT70 = 35 ms  $\pm$  6 ms, AT20=  
286 38ms  $\pm$  5 ms, AT0 = 35ms  $\pm$  4 ms, TA20 = 33ms  $\pm$  4 ms, and TA70 = 24ms  $\pm$  4 ms.  
287 Surprisingly, we observed significantly slower response times for the AT500 relative to the  
288 unisensory auditory condition, i.e. a negative redundant target effect (across subjects' mean  $\pm$   
289 SEM) = -16ms  $\pm$  4 ms. In summary, our psychophysics study revealed that audiotactile  
290 interactions within a 70 ms temporal integration window (TIW) facilitate stimulus processing  
291 and response selection leading to faster response times.

292

### 293 **Audiotactile interactions for ERPs: limited to a TIW**

294 Figure 1C shows the ERPs for the A, T, AT and N conditions. Both tactile-alone (pink) and  
295 auditory-alone (green) stimulation evoked a characteristic N100 followed by a P200, while the  
296 null condition is a flat baseline. The tactile and auditory stimulation together generate the AT  
297 evoked potentials across the different asynchrony levels (Figure 1C, black). While the influences

298 of both the tactile and auditory evoked responses are clearly visible in the AT responses, we can  
299 also observe small deviations from the unisensory responses. In the following, we investigate  
300 whether the AT+N responses deviate significantly from the sum of the A and T responses (i.e.  
301 the AT interaction).

302 Figure 3 shows the ERPs for the sum over A+T (dark blue), sum over AT + N (light blue),  
303 and the difference  $(A+T) - (AT + N)$ , i.e. the audiotactile interaction effects across different  
304 asynchrony levels. For ERPs we observed three AT interaction effects that differed in their  
305 expression across levels of AT asynchrony (for significance of the test results, please see Figure  
306 2).

307 The first AT interaction effect arose early, at about 100 ms post-stimulus, with a central  
308 topography and was significant only for the synchronous condition (Figure 3, AT0 row).  
309 Specifically, a modulation, during and after the N100 (70-170 ms), was found in both central and  
310 posterior sensors, with the A+T greater than the AT+N during this time. We note that a trend for  
311 this spatiotemporal effect was also observed for the AT20 condition.

312 The second AT interaction effect, where A+T was more negative than the AT+N, arose later  
313 at about 370-400 ms mainly over posterior electrodes for AT asynchrony conditions within a  $\leq$   
314 20 ms temporal integration window (Figures 2, AT20, AT0, and TA20 rows). Even though this  
315 AT interaction effect was significant only for AT20 and TA20, we observed a qualitatively  
316 similar pattern for the synchronous AT0 condition.

317 The third AT interaction effect emerged at about 200 ms after the second stimulus (latency  
318 range: 140-220 ms), was most pronounced over frontocentral electrodes, and was selective for  
319 the asynchrony of  $\pm 70$  ms (Figure 3, AT70 and TA70 rows). This AT interaction modulated the

320 shape and magnitude of the P200: the P200 occurred earlier and was reduced in amplitude for the  
321 AT+N relative to A+T.

322 In summary, we observed three distinct AT interaction effects for ERPs that were expressed at  
323 different AT asynchronies. Nevertheless, all AT interaction effects arose within the behavioural  
324  $\leq 70$  ms TIW, while no significant AT interactions were found for the AT500 or TA500  
325 conditions.

326

### 327 **Audiotactile interactions for ITC: selective for $\pm 70$ ms asynchronies**

328 Figure 4 shows the ITC for the sum over A+T (light blue), sum over AT + N (dark blue), and the  
329 difference (A+T) – (AT + N) (orange), i.e. the audiotactile interaction effects across different  
330 asynchrony levels, as well as unisensory and null conditions separately. We observed significant  
331 AT interactions for ITC in the theta band (4-8 Hz) specifically for  $\pm 70$  ms asynchrony levels  
332 (Figure 4, AT70 and TA70 rows; Figure 2 for significance test results). As shown in Figure 4,  
333 the summed ‘AT+N’ ITC was greater than the summed ‘A+T’ for the auditory leading AT70,  
334 but smaller for tactile leading TA70 condition. Thus, the direction of the audiotactile ITC  
335 interaction depends on whether the auditory or the tactile sense is leading. The AT interaction  
336 arose at about 200 ms post-stimulus and was most prominent over frontocentral electrodes,  
337 mimicking the AT interactions we observed for the P200 in the ERP analysis (Figure 3B, AT70  
338 and TA70 rows). In summary, the AT interactions for the theta-band ITC were selective for  $\pm 70$   
339 ms asynchronies and most likely associated with the ERP effects at the same post-stimulus  
340 latency and asynchrony conditions.

341

### 342 **Audiotactile interactions for time-frequency power across AT asynchronies**

343 Figure 5 shows the TF power for the sum over A+T (light blue), sum over AT + N (dark blue),  
344 and the difference (A+T) – (AT + N) (orange), i.e. the audiotactile interaction effects across  
345 different asynchrony levels, as well as unisensory and null conditions separately. For  
346 significance test results, see Figure 2.

347 *Theta power:* Both auditory and tactile stimuli induced theta power peaking at about 200 ms  
348 post-stimulus primarily over fronto-central electrodes (Figure 5; Unisensory row). This peak in  
349 theta power corresponds to the P200 (Figure 3) in the ERP analysis and an increase in ITC  
350 (Figure 4). Note that our data illustrate the point that the ‘A+T’ sum (Figure 5: AT0 light blue),  
351 which was computed by first summing trials before frequency transformation according to  
352 Senkowski et al. (2007), is indeed different than if the power of the tactile (Figure 5: Unisensory  
353 pink) and auditory (Figure 5: Unisensory green) had first been computed and then summed.

354 We observed significant AT interactions in the theta band at about 200 ms post-stimulus over  
355 fronto-central electrodes across several asynchrony levels including AT70, AT20, and TA70.  
356 These fronto-central AT interactions arose as a result of the AT+N power peak being weaker and  
357 decaying earlier relative to the A+T sum. Critically, these fronto-central AT interactions for  
358 theta power were most pronounced for  $\pm 70$  ms asynchrony levels, expressed less strongly for  $\pm$   
359 20 ms and  $\pm 500$  ms asynchrony and completely absent for synchrony AT0 stimulation (see also  
360 Figure 6d).

361 In addition, we observed significant AT interactions for theta power in the AT500 condition.  
362 Specifically, in both early (60-600 ms) and late (610-1200 ms) time windows, AT interactions  
363 were found with topographies that were distinct from the fronto-central P200-like theta-band  
364 effects.



365 *Alpha/Beta power*: Because unisensory power changes and AT interactions were qualitatively  
366 similar between the alpha and the low-beta bands, we combined these into one alpha/beta band  
367 (8-20 Hz). Both tactile and auditory stimuli induced changes in the alpha/beta band primarily  
368 over posterior channels (Figure 5, Unisensory row), which were more pronounced for tactile  
369 stimulation. Auditory and tactile stimulation initially suppressed alpha/beta power (event-related  
370 desynchronization; ERD) around 250 ms post-stimulation followed by a rebound (event-related  
371 synchronisation; ERS) above and beyond baseline, around 800-1000 ms post-stimulation. This  
372 alpha/beta power rebound was altered for AT + N relative to A + T across several asynchrony  
373 levels including AT70, AT20, AT0, and TA70 conditions (Figure 2 for statistics and Figure 5).  
374 Specifically, the rebound in alpha/beta power occurred earlier, was attenuated, and decayed  
375 faster for AT+N than the A+T sum, where alpha/beta power rebound was found to be more  
376 sustained (800-1100 ms post-stimulation).

377

### 378 **Summary of AT integration effects**

379 To provide an overview over the diverse AT interactions that we observed for ERPs, ITC, and  
380 TF power, Figure 6 summarises the results, averaged over relevant spatial, temporal, and  
381 frequency selections: the sum of the auditory and tactile (A+T; light blue), the sum of  
382 audiotactile plus null (AT+N; dark blue) and the audiotactile interaction, i.e. the difference  
383  $[AT+N]-[A+V]$  as a function of AT asynchrony: 0,  $\pm 20$ ,  $\pm 70$ ,  $\pm 500$  ms. This enables us to  
384 characterise the profile of the AT interaction effects across asynchrony levels, including sub-  
385 threshold effects in one asynchrony that relate to a significant effect in another asynchrony.

386 The early (~125 ms latency) AT interactions for ERPs followed an inverted U-shape function  
387 that was constrained by a  $\leq 20$  ms TIW. They were significant only for AT0 and tapered off with  
388 subthreshold effects at AT20 (Figure 6a).

389 The AT interactions for P200 in ERPs and theta band ITC at ~200 ms were significant  
390 selectively for  $\pm 70$  ms AT asynchronies (Figure 6b and 6c). Surprisingly, the interactions for the  
391 ERPs (i.e. P200) were symmetric and positive for both auditory and tactile leading asynchrony,  
392 while the interactions for the ITC were asymmetric, i.e. negative for A leading and positive for T  
393 leading asynchrony levels. This asymmetry and asynchrony specificity indicates that these ITC  
394 effects are sensitive to the relative timing of the auditory and tactile signals - pointing towards  
395 mechanisms of phase resetting.

396 The corresponding AT interactions for theta band TFP at ~200 ms post-stimulus were present  
397 (at least at a sub-threshold level) across all AT asynchronies except for the physically  
398 synchronous AT stimulation (Figure 6d). Specifically, we observed significant AT interactions  
399 (i.e. reduction for AT+N relative to A+T) for AT500, AT70, AT20, and TA70 and non-  
400 significant trends for TA20 and TA500.

401 The late AT interactions at ~400 ms latency for ERPs followed an inverted U-shape function  
402 mimicking the response facilitation at the behavioural level (Figure 6e). These interactions were  
403 significant for AT20 and TA20, with subthreshold effects for AT0, AT70, and TA70. Figure 3  
404 shows that this late AT interaction emerges because the phase of the summed A+T response  
405 ('trough') is in opposition to the phase of the summed AT+N response ('peak').

406 Finally, the late AT interactions for the alpha/beta band power "rebound" were observed  
407 across several asynchronies (AT70, AT20, AT0, and TA70) (Figure 6f). They resulted from an

408 earlier occurrence and faster decay of the alpha/beta rebound for the AT+N compared to the sum  
409 A + T and were most pronounced for A leading asynchronies (Figure 5).

410 To summarise, AT interactions were expressed across AT asynchrony levels with three  
411 distinct profiles: i. inverted U-shape profile: early N100 and late 400 ms ERP effects, ii. most  
412 pronounced for AT asynchronies of  $\pm 70$  ms: ERP, ITC theta, and TFP theta effects at about 200  
413 ms, and iii. most prominent for A leading asynchronies and present even outside the behavioural  
414 TIW: late alpha/beta TFP rebound effects.

415

## 416 **Discussion**

417 The current study presented A, T, and AT stimuli at several asynchrony levels to investigate the  
418 temporal constraints that govern behavioural response facilitation and neural AT interactions for  
419 ERPs, ITC, and induced TF power.

420 Consistent with previous research (Colonus and Diederich, 2004), we observed an inverted  
421 U-shape function for the behavioural AT benefit – also coined the redundant target effect  
422 (Miller, 1982)- that was maximal for synchronous AT combinations and tapered off with  
423 increasing AT asynchrony within a TIW of  $\leq 70$  ms (Zampini et al., 2005).

424 At the neural level we observed early AT interactions for evoked responses (ERP) at about  
425 110 ms post-stimulus, which dovetails nicely with previous research showing multisensory  
426 modulations of the N1 auditory component by visual and tactile stimuli (Foxe et al., 2000,  
427 Lutkenhoner et al., 2002, Murray et al., 2005, Sperdin et al., 2009, Stekelenburg and Vroomen,  
428 2009). Critically, our observed early AT interactions were sensitive to the relative timing of the  
429 AT stimuli: they were most pronounced for synchronous AT stimuli and tapered off within a  
430 small TIW of  $\leq 20$  ms. This temporal precision may be enhanced for interactions of tactile with

431 other sensory signals, because tactile latencies are fixed for a particular body location and do not  
432 vary depending on the distance of the stimulus from the observer as in audition and vision. The  
433 short latency and narrow temporal binding window points towards neural interactions in low  
434 level or even primary auditory cortices that may rely on direct connectivity between sensory  
435 areas (Fu et al., 2003, Cappe and Barone, 2005, de la Mothe et al., 2006a, Smiley et al., 2007) or  
436 thalamic mechanisms (de la Mothe et al., 2006b, Hackett et al., 2007, Cappe et al., 2009) and  
437 that increase the saliency of AT events leading to faster and more accurate detection.

438 Later, at about 400 ms post-stimulus, we observed audiotactile ERP interactions that were  
439 again most pronounced for synchronous AT stimuli, but confined to a broader TIW of  $\leq 70$  ms,  
440 which is consistent with a hierarchical organisation of AT interactions where early effects in low  
441 level sensory areas are confined to a narrower temporal integration windows than later  
442 interactions in association cortices (Hasson et al., 2008, Kiebel et al., 2008, Werner and  
443 Noppeney, 2011). Moreover, the later interactions may in turn top-down modulate neural  
444 processes in lower regions via feed-back loops (Falchier et al., 2002, Schroeder and Foxe, 2002,  
445 Clavagnier et al., 2004). Both early and late ERP interactions followed an inverted U-shape  
446 function thereby mimicking the temporal profile of the redundant target effect that characterised  
447 observers' behaviour.

448 While the ERP effects at  $\sim 125$  ms and  $\sim 400$  ms post-stimulus were constrained by classical  
449 temporal integration windows, the AT interactions for the P200 ERP component were most  
450 pronounced for  $\pm 70$  ms AT asynchrony and absent for near-synchronous AT stimulation (see  
451 Figure 3 and Figure 6b). Both the auditory and the tactile unisensory P200 are thought to be  
452 generated in regions previously implicated in audiotactile integration (Foxe et al., 2002, Kayser  
453 et al., 2005, Murray et al., 2005, Schurmann et al., 2006) such as the auditory belt area CM or

454 planum temporale (Godey et al., 2001, Crowley and Colrain, 2004, Smiley et al., 2007) and  
455 secondary somatosensory areas (Forss et al., 1994, Disbrow et al., 2001), respectively. Our  
456 results show that AT integration facilitates neural processing at about 200 ms post-stimulus: the  
457 P200 peaks earlier, is smaller, and/or decays faster for the AT+N sum when compared to the sum  
458 of the unisensory A and T conditions, consistent with multisensory literature, e.g. (Rowland et  
459 al., 2007).

460 The P200 effects were also directly related to AT interactions for theta-band ITC that  
461 emerged with a central topography again at ~200 ms post-stimulus selectively for  $\pm 70$  ms AT  
462 asynchrony (compare Figures 6b and 6c). Critically, whilst the ERP interactions followed a  
463 similar temporal profile and topography irrespective of whether the auditory or the tactile  
464 stimulus is leading, the ITC effects were inverted for auditory relative to tactile leading  
465 stimulation. This dissociation between ERP and ITC can be shown to occur in simulation  
466 ([https://github.com/johanna-zumer/audtac/blob/master/simulate\\_70results.m](https://github.com/johanna-zumer/audtac/blob/master/simulate_70results.m)). The selectivity of  
467 the P200 and the phase coherence effects for  $\pm 70$  ms AT asynchrony may be best accounted for  
468 by mechanisms of phase resetting that have previously been implicated in audiotactile and  
469 audiovisual interactions in auditory cortices (Lakatos et al., 2007, Kayser et al., 2008, Thorne et  
470 al., 2011). From a functional perspective, a preceding tactile stimulus may reset the phase in  
471 auditory cortices and thereby facilitate the localization of an auditory stimulus that is presented  
472 70 ms later. Likewise, a preceding auditory stimulus may provide an alert to facilitate tactile  
473 processing and possible avoidance actions. Not only have tones been shown to elicit responses  
474 in somatosensory cortex (Borgest and Ermolaeva, 1975, Liang et al., 2013), but also an  
475 *inhibitory* multisensory interaction by auditory stimulation was found in cat somatosensory area  
476 SIV (Dehner et al., 2004) and auditory projections were found to inhibitory interneurons in cat

477 SIV (Keniston et al., 2010). In summary, our P200 and ITC results are supported by evidence of  
478 bidirectional audiotactile integration, especially to association cortices, and of directional  
479 asymmetries in the AT interaction (Cecere et al., 2017).

480 The AT interactions discussed so far were moulded by two distinct neural mechanisms: i.  
481 ERP effects at ~100 and ~400 ms that followed an inverted U-shape function mimicking the  
482 temporal binding window at the behavioural level and ii. P200 and theta ITC effects that were  
483 selective for a particular level of AT asynchrony and may be mediated by mechanisms of phase  
484 resetting. In contrast, AT interactions for induced theta oscillatory power were less specific and  
485 expressed not only for  $\pm 70$  ms asynchrony, but across several asynchrony levels in particular  
486 when the auditory stimulus was leading. While the topography and timing of the theta TF power  
487 interactions *within* the TIW matched that of the P200 and ITC interactions, a distinct  
488 topographical effect was found *outside* the classical behavioural integration window, in the  
489 AT500 condition. Further, this enhanced oscillatory theta power was sustained until 1150 ms, i.e.  
490 beyond the time needed to make a response in the redundant target paradigm of the associated  
491 psychophysics study. We suggest that the AT theta power effects may reflect non-specific  
492 mechanisms of multisensory priming or attention by which a preceding A signal may alert the  
493 observer to imminent touch events, in light of the debate as to whether cross-modal stimuli with  
494 asynchronies up to 500-600 ms may be actually *integrated* or whether the first stimulus (only)  
495 primes and/or draws exogenous (spatial) cross-modal attention (Macaluso et al., 2001,  
496 McDonald et al., 2001, Stein et al., 2010). Alternatively, the AT500 condition may be viewed as  
497 a type of “No-go” trial in which a response to the second stimulus is to be withheld, which has  
498 previously been shown to be associated with frontal theta oscillations (Kirmizi-Alsan et al.,  
499 2006, Harper et al., 2014).

500 Likewise, we observed AT interactions for alpha/beta oscillatory power at ~1000 ms post-  
501 stimulus. As shown in Figure 5, both auditory and tactile stimuli suppressed alpha/beta  
502 oscillatory power (event-related desynchronization; ERD) at about 200-400 ms, related to a  
503 release from inhibition, followed by a rebound in power beyond baseline levels from about 600  
504 ms – 1200 ms post-stimulus (event-related synchronisation; ERS), related to resetting and  
505 recovery (Pfurtscheller and Lopes da Silva, 1999, Neuper and Pfurtscheller, 2001). Our results  
506 show that the initial suppression (ERD) of alpha/beta power is not significantly different from  
507 the sum of the auditory and tactile induced suppressions; yet, the rebound in alpha/beta power for  
508 the AT+Null sum is weaker and decays faster than predicted by the A+T sum of the additive  
509 model. Further, we observed significant AT interactions for the alpha/beta rebound for AT70,  
510 AT20, AT0, and TA70, and as a non-significant trend for the AT500 asynchrony level. Because  
511 the AT interactions of power rebound occurred after the explicit detection response is made by  
512 participants in the redundant target paradigm, it may be a consequence of the implicit AT event  
513 detection, or be associated with post-decisional processes such as metacognitive monitoring  
514 (Deroy et al., 2016), or the binding of asynchronous signals into a single multisensory percept  
515 (Roa Romero et al., 2015). Future redundant target paradigms that combine target detection with  
516 post-decisional tasks (e.g. confidence judgments) may enable us to further determine the  
517 functional role of the alpha/beta rebound and the associated AT interactions. The distinct  
518 response profile for theta versus alpha/beta power, varying with stimulus asynchrony, is in line  
519 with distinct mechanisms for different frequencies (Keil and Senkowski, 2018).

520 To conclude, this psychophysics-EEG study unravels a multitude of neural interactions, which  
521 arose with different temporal constraints: interactions were confined to a TIW for ERPs, specific  
522 for one particular asynchrony for inter-trial coherence, and extending beyond the behavioural

523 TIW for induced low frequency power. This diversity of temporal profiles demonstrates that  
524 distinct neural mechanisms govern a cascade of multisensory integration processes.

525

526 **References:**

527 Atilgan H, Town SM, Wood KC, Jones GP, Maddox RK, Lee AKC, Bizley JK (2018)

528 Integration of Visual Information in Auditory Cortex Promotes Auditory Scene Analysis  
529 through Multisensory Binding. *Neuron* 97:640-655 e644.

530 Berger CC, Ehrsson HH (2014) The fusion of mental imagery and sensation in the temporal  
531 association cortex. *J Neurosci* 34:13684-13692.

532 Bizley JK, Nodal FR, Bajo VM, Nelken I, King AJ (2007) Physiological and anatomical  
533 evidence for multisensory interactions in auditory cortex. *Cereb Cortex* 17:2172-2189.

534 Blurton SP, Greenlee MW, Gondan M (2015) Cross-modal cueing in audiovisual spatial  
535 attention. *Atten Percept Psychophys* 77:2356-2376.

536 Borgest AN, Ermolaeva V (1975) [Functional organization of pathways transmitting auditory  
537 signals in the somatosensory zone of the cat cerebral cortex]. *Neirofiziologiya* 7:476-485.

538 Cappe C, Barone P (2005) Heteromodal connections supporting multisensory integration at low  
539 levels of cortical processing in the monkey. *Eur J Neurosci* 22:2886-2902.

540 Cappe C, Morel A, Barone P, Rouiller EM (2009) The thalamocortical projection systems in  
541 primate: an anatomical support for multisensory and sensorimotor interplay. *Cereb*  
542 *Cortex* 19:2025-2037.

543 Cecere R, Gross J, Willis A, Thut G (2017) Being First Matters: Topographical Representational  
544 Similarity Analysis of ERP Signals Reveals Separate Networks for Audiovisual  
545 Temporal Binding Depending on the Leading Sense. *J Neurosci* 37:5274-5287.



- 546 Clavagnier S, Falchier A, Kennedy H (2004) Long-distance feedback projections to area V1:  
547 implications for multisensory integration, spatial awareness, and visual consciousness.  
548 *Cogn Affect Behav Neurosci* 4:117-126.
- 549 Colonius H, Diederich A (2004) Multisensory interaction in saccadic reaction time: a time-  
550 window-of-integration model. *J Cogn Neurosci* 16:1000-1009.
- 551 Crowley KE, Colrain IM (2004) A review of the evidence for P2 being an independent  
552 component process: age, sleep and modality. *Clin Neurophysiol* 115:732-744.
- 553 Dahl CD, Logothetis NK, Kayser C (2009) Spatial organization of multisensory responses in  
554 temporal association cortex. *J Neurosci* 29:11924-11932.
- 555 de la Mothe LA, Blumell S, Kajikawa Y, Hackett TA (2006a) Cortical connections of the  
556 auditory cortex in marmoset monkeys: core and medial belt regions. *J Comp Neurol*  
557 496:27-71.
- 558 de la Mothe LA, Blumell S, Kajikawa Y, Hackett TA (2006b) Thalamic connections of the  
559 auditory cortex in marmoset monkeys: core and medial belt regions. *J Comp Neurol*  
560 496:72-96.
- 561 Dehner LR, Keniston LP, Clemo HR, Meredith MA (2004) Cross-modal circuitry between  
562 auditory and somatosensory areas of the cat anterior ectosylvian sulcal cortex: a 'new'  
563 inhibitory form of multisensory convergence. *Cereb Cortex* 14:387-403.
- 564 Deroy O, Spence C, Noppeney U (2016) Metacognition in Multisensory Perception. *Trends*  
565 *Cogn Sci* 20:736-747.
- 566 Diederich A, Colonius H (2004) Bimodal and trimodal multisensory enhancement: effects of  
567 stimulus onset and intensity on reaction time. *Percept Psychophys* 66:1388-1404.

- 568 Disbrow E, Roberts T, Poeppel D, Krubitzer L (2001) Evidence for interhemispheric processing  
569 of inputs from the hands in human S2 and PV. *J Neurophysiol* 85:2236-2244.
- 570 Donohue SE, Green JJ, Woldorff MG (2015) The effects of attention on the temporal integration  
571 of multisensory stimuli. *Front Integr Neurosci* 9:32.
- 572 Downar J, Crawley AP, Mikulis DJ, Davis KD (2000) A multimodal cortical network for the  
573 detection of changes in the sensory environment. *Nat Neurosci* 3:277-283.
- 574 Falchier A, Clavagnier S, Barone P, Kennedy H (2002) Anatomical evidence of multimodal  
575 integration in primate striate cortex. *J Neurosci* 22:5749-5759.
- 576 Fetsch CR, Pouget A, DeAngelis GC, Angelaki DE (2011) Neural correlates of reliability-based  
577 cue weighting during multisensory integration. *Nat Neurosci* 15:146-154.
- 578 Forss N, Salmelin R, Hari R (1994) Comparison of somatosensory evoked fields to airpuff and  
579 electric stimuli. *Electroencephalogr Clin Neurophysiol* 92:510-517.
- 580 Foxe JJ, Morocz IA, Murray MM, Higgins BA, Javitt DC, Schroeder CE (2000) Multisensory  
581 auditory-somatosensory interactions in early cortical processing revealed by high-density  
582 electrical mapping. *Brain Res Cogn Brain Res* 10:77-83.
- 583 Foxe JJ, Schroeder CE (2005) The case for feedforward multisensory convergence during early  
584 cortical processing. *Neuroreport* 16:419-423.
- 585 Foxe JJ, Wylie GR, Martinez A, Schroeder CE, Javitt DC, Guilfoyle D, Ritter W, Murray MM  
586 (2002) Auditory-somatosensory multisensory processing in auditory association cortex:  
587 an fMRI study. *J Neurophysiol* 88:540-543.
- 588 Fu KM, Johnston TA, Shah AS, Arnold L, Smiley J, Hackett TA, Garraghty PE, Schroeder CE  
589 (2003) Auditory cortical neurons respond to somatosensory stimulation. *J Neurosci*  
590 23:7510-7515.

- 591 Ghazanfar AA, Schroeder CE (2006) Is neocortex essentially multisensory? Trends Cogn Sci  
592 10:278-285.
- 593 Giard MH, Peronnet F (1999) Auditory-visual integration during multimodal object recognition  
594 in humans: a behavioral and electrophysiological study. J Cogn Neurosci 11:473-490.
- 595 Godey B, Schwartz D, de Graaf JB, Chauvel P, Liegeois-Chauvel C (2001) Neuromagnetic  
596 source localization of auditory evoked fields and intracerebral evoked potentials: a  
597 comparison of data in the same patients. Clin Neurophysiol 112:1850-1859.
- 598 Hackett TA, De La Mothe LA, Ulbert I, Karmos G, Smiley J, Schroeder CE (2007) Multisensory  
599 convergence in auditory cortex, II. Thalamocortical connections of the caudal superior  
600 temporal plane. J Comp Neurol 502:924-952.
- 601 Harper J, Malone SM, Bernat EM (2014) Theta and delta band activity explain N2 and P3 ERP  
602 component activity in a go/no-go task. Clin Neurophysiol 125:124-132.
- 603 Harrar V, Harris LR (2008) The effect of exposure to asynchronous audio, visual, and tactile  
604 stimulus combinations on the perception of simultaneity. Exp Brain Res 186:517-524.
- 605 Hasson U, Yang E, Vallines I, Heeger DJ, Rubin N (2008) A hierarchy of temporal receptive  
606 windows in human cortex. J Neurosci 28:2539-2550.
- 607 Hershenson M (1962) Reaction time as a measure of intersensory facilitation. J Exp Psychol  
608 63:289-293.
- 609 Hoefler M, Tyll S, Kanowski M, Brosch M, Schoenfeld MA, Heinze HJ, Noesselt T (2013)  
610 Tactile stimulation and hemispheric asymmetries modulate auditory perception and  
611 neural responses in primary auditory cortex. Neuroimage 79:371-382.

- 612 Ibrahim LA, Mesik L, Ji XY, Fang Q, Li HF, Li YT, Zingg B, Zhang LI, Tao HW (2016) Cross-  
613 Modality Sharpening of Visual Cortical Processing through Layer-1-Mediated Inhibition  
614 and Disinhibition. *Neuron* 89:1031-1045.
- 615 Kayser C, Petkov CI, Augath M, Logothetis NK (2005) Integration of touch and sound in  
616 auditory cortex. *Neuron* 48:373-384.
- 617 Kayser C, Petkov CI, Augath M, Logothetis NK (2007) Functional imaging reveals visual  
618 modulation of specific fields in auditory cortex. *J Neurosci* 27:1824-1835.
- 619 Kayser C, Petkov CI, Logothetis NK (2008) Visual modulation of neurons in auditory cortex.  
620 *Cereb Cortex* 18:1560-1574.
- 621 Keil J, Senkowski D (2018) Neural Oscillations Orchestrate Multisensory Processing.  
622 *Neuroscientist* 1073858418755352.
- 623 Keniston LP, Henderson SC, Meredith MA (2010) Neuroanatomical identification of crossmodal  
624 auditory inputs to interneurons in somatosensory cortex. *Exp Brain Res* 202:725-731.
- 625 Kiebel SJ, Daunizeau J, Friston KJ (2008) A hierarchy of time-scales and the brain. *PLoS*  
626 *Comput Biol* 4:e1000209.
- 627 Kirmizi-Alsan E, Bayraktaroglu Z, Gurvit H, Keskin YH, Emre M, Demiralp T (2006)  
628 Comparative analysis of event-related potentials during Go/NoGo and CPT:  
629 decomposition of electrophysiological markers of response inhibition and sustained  
630 attention. *Brain Res* 1104:114-128.
- 631 Lakatos P, Chen CM, O'Connell MN, Mills A, Schroeder CE (2007) Neuronal oscillations and  
632 multisensory interaction in primary auditory cortex. *Neuron* 53:279-292.
- 633 Leclercq Y, Schrouff J, Noirhomme Q, Maquet P, Phillips C (2011) fMRI artefact rejection and  
634 sleep scoring toolbox. *Comput Intell Neurosci* 2011:598206.

- 635 Leonardelli E, Braun C, Weisz N, Lithari C, Occelli V, Zampini M (2015) Prestimulus  
636 oscillatory alpha power and connectivity patterns predispose perceptual integration of an  
637 audio and a tactile stimulus. *Hum Brain Mapp* 36:3486-3498.
- 638 Liang M, Mouraux A, Hu L, Iannetti GD (2013) Primary sensory cortices contain distinguishable  
639 spatial patterns of activity for each sense. *Nat Commun* 4:1979.
- 640 Lutkenhoner B, Lammertmann C, Simoes C, Hari R (2002) Magnetoencephalographic correlates  
641 of audiotactile interaction. *Neuroimage* 15:509-522.
- 642 Macaluso E, Frith C, Driver J (2001) (Response to) Multisensory Integration and Crossmodal  
643 Attention Effects in the Human Brain. *Science* 292:1791-1791.
- 644 McDonald JJ, Teder-Sälejärvi WA, Ward LM (2001) Multisensory Integration and Crossmodal  
645 Attention Effects in the Human Brain. *Science* 292:1791-1791.
- 646 Megevand P, Molholm S, Nayak A, Foxe JJ (2013) Recalibration of the multisensory temporal  
647 window of integration results from changing task demands. *PLoS One* 8:e71608.
- 648 Mercier MR, Foxe JJ, Fiebelkorn IC, Butler JS, Schwartz TH, Molholm S (2013) Auditory-  
649 driven phase reset in visual cortex: human electrocorticography reveals mechanisms of  
650 early multisensory integration. *Neuroimage* 79:19-29.
- 651 Mercier MR, Molholm S, Fiebelkorn IC, Butler JS, Schwartz TH, Foxe JJ (2015) Neuro-  
652 oscillatory phase alignment drives speeded multisensory response times: an electro-  
653 corticographic investigation. *J Neurosci* 35:8546-8557.
- 654 Meredith MA, Stein BE (1983) Interactions among converging sensory inputs in the superior  
655 colliculus. *Science* 221:389-391.
- 656 Miller J (1982) Divided attention: evidence for coactivation with redundant signals. *Cogn*  
657 *Psychol* 14:247-279.

- 658 Molholm S, Ritter W, Murray MM, Javitt DC, Schroeder CE, Foxe JJ (2002) Multisensory  
659 auditory-visual interactions during early sensory processing in humans: a high-density  
660 electrical mapping study. *Brain Res Cogn Brain Res* 14:115-128.
- 661 Murray MM, Molholm S, Michel CM, Heslenfeld DJ, Ritter W, Javitt DC, Schroeder CE, Foxe  
662 JJ (2005) Grabbing your ear: rapid auditory-somatosensory multisensory interactions in  
663 low-level sensory cortices are not constrained by stimulus alignment. *Cereb Cortex*  
664 15:963-974.
- 665 Navarra J, Soto-Faraco S, Spence C (2007) Adaptation to audiotactile asynchrony. *Neurosci Lett*  
666 413:72-76.
- 667 Neuper C, Pfurtscheller G (2001) Event-related dynamics of cortical rhythms: frequency-specific  
668 features and functional correlates. *Int J Psychophysiol* 43:41-58.
- 669 Nishi A, Yokoyama M, Ogawa K, Ogata T, Nozawa T, Miyake Y (2014) Effects of Voluntary  
670 Movements on Audio-Tactile Temporal Order Judgment. *IEEE T Inf Syst E97d*:1567-  
671 1573.
- 672 Oostenveld R, Fries P, Maris E, Schoffelen JM (2011) FieldTrip: Open source software for  
673 advanced analysis of MEG, EEG, and invasive electrophysiological data. *Comput Intell*  
674 *Neurosci* 2011:156869.
- 675 Pfurtscheller G, Lopes da Silva FH (1999) Event-related EEG/MEG synchronization and  
676 desynchronization: basic principles. *Clin Neurophysiol* 110:1842-1857.
- 677 Roa Romero Y, Senkowski D, Keil J (2015) Early and late beta-band power reflect audiovisual  
678 perception in the McGurk illusion. *J Neurophysiol* 113:2342-2350.
- 679 Rohe T, Noppeney U (2015) Cortical hierarchies perform Bayesian causal inference in  
680 multisensory perception. *PLoS Biol* 13:e1002073.

- 681 Rohe T, Noppeney U (2016) Distinct Computational Principles Govern Multisensory Integration  
682 in Primary Sensory and Association Cortices. *Curr Biol* 26:509-514.
- 683 Rowland BA, Quessy S, Stanford TR, Stein BE (2007) Multisensory integration shortens  
684 physiological response latencies. *J Neurosci* 27:5879-5884.
- 685 Rowland BA, Stein BE (2007) Multisensory integration produces an initial response  
686 enhancement. *Front Integr Neurosci* 1:4.
- 687 Schroeder CE, Foxe JJ (2002) The timing and laminar profile of converging inputs to  
688 multisensory areas of the macaque neocortex. *Brain Res Cogn Brain Res* 14:187-198.
- 689 Schurmann M, Caetano G, Hlushchuk Y, Jousmaki V, Hari R (2006) Touch activates human  
690 auditory cortex. *Neuroimage* 30:1325-1331.
- 691 Senkowski D, Gomez-Ramirez M, Lakatos P, Wylie GR, Molholm S, Schroeder CE, Foxe JJ  
692 (2007) Multisensory processing and oscillatory activity: analyzing non-linear  
693 electrophysiological measures in humans and simians. *Exp Brain Res* 177:184-195.
- 694 Senkowski D, Schneider TR, Foxe JJ, Engel AK (2008) Crossmodal binding through neural  
695 coherence: implications for multisensory processing. *Trends Neurosci* 31:401-409.
- 696 Smiley JF, Hackett TA, Ulbert I, Karmas G, Lakatos P, Javitt DC, Schroeder CE (2007)  
697 Multisensory convergence in auditory cortex, I. Cortical connections of the caudal  
698 superior temporal plane in macaque monkeys. *J Comp Neurol* 502:894-923.
- 699 Sperdin HF, Cappe C, Foxe JJ, Murray MM (2009) Early, low-level auditory-somatosensory  
700 multisensory interactions impact reaction time speed. *Front Integr Neurosci* 3:2.
- 701 Stanford TR, Quessy S, Stein BE (2005) Evaluating the operations underlying multisensory  
702 integration in the cat superior colliculus. *J Neurosci* 25:6499-6508.

703 Stein BE, Burr D, Constantinidis C, Laurienti PJ, Alex Meredith M, Perrault TJ, Jr.,  
704 Ramachandran R, Roder B, Rowland BA, Sathian K, Schroeder CE, Shams L, Stanford  
705 TR, Wallace MT, Yu L, Lewkowicz DJ (2010) Semantic confusion regarding the  
706 development of multisensory integration: a practical solution. *Eur J Neurosci* 31:1713-  
707 1720.

708 Stekelenburg JJ, Vroomen J (2009) Neural correlates of audiovisual motion capture. *Exp Brain*  
709 *Res* 198:383-390.

710 Thorne JD, De Vos M, Viola FC, Debener S (2011) Cross-modal phase reset predicts auditory  
711 task performance in humans. *J Neurosci* 31:3853-3861.

712 van Wassenhove V, Grant KW, Poeppel D (2007) Temporal window of integration in auditory-  
713 visual speech perception. *Neuropsychologia* 45:598-607.

714 Werner S, Noppeney U (2010a) Distinct functional contributions of primary sensory and  
715 association areas to audiovisual integration in object categorization. *J Neurosci* 30:2662-  
716 2675.

717 Werner S, Noppeney U (2010b) Superadditive responses in superior temporal sulcus predict  
718 audiovisual benefits in object categorization. *Cereb Cortex* 20:1829-1842.

719 Werner S, Noppeney U (2011) The contributions of transient and sustained response codes to  
720 audiovisual integration. *Cereb Cortex* 21:920-931.

721 Zampini M, Brown T, Shore DI, Maravita A, Roder B, Spence C (2005) Audiotactile temporal  
722 order judgments. *Acta Psychol (Amst)* 118:277-291.

723

724



725 **Legends**

726 **Figure 1.** Experimental design, behavioural results, and evoked responses. **a**, Each row depicts  
727 the onsets of the auditory stimulation (indicated by loudspeaker) and tactile stimulation  
728 (indicated by face) for each of the 10 conditions including the null (N), auditory alone (A), tactile  
729 alone (T) and the seven AT conditions with asynchrony: 0,  $\pm 20$ ,  $\pm 70$ , and  $\pm 500$  ms. The wavy  
730 line at the bottom indicates the continuous MRI background noise. **b**, Reaction times (across  
731 subjects' mean  $\pm$  SEM). The black lines indicate the AT conditions as a function of AT  
732 asynchrony with negative asynchronies indicating auditory-leading; the green and pink bars  
733 indicate the A and T conditions, respectively. **c**, Evoked response potentials for N, A, T, and AT  
734 conditions for frontocentral ['Fz' 'Cz' 'F1' 'F2' 'FC1' 'FC2' 'C1' 'C2'] and posterior ['CP5' 'POz' 'Pz'  
735 'P3' 'P4' 'C4' 'O1' 'O2' 'P7' 'PO7'] sets of sensors. The A evoked response is shifted by the  
736 appropriate asynchrony to align with the auditory onset in the corresponding AT condition.

737

738 **Figure 2:** Statistics for behavioural and neural results for each AT asynchrony (rows).  
739 *Behavioural redundant target effect (RTE):* paired t-tests (sample size: N=22; degrees of  
740 freedom = 21) comparing the AT response time with the minimal unisensory response time. For  
741 AT500 the AT response was slower than the minimal unisensory response (negative t-value).  
742 The “e” indicates “x 10<sup>e</sup>”. *Neural AT interactions [(A+T) – (AT + N)]* for ERPs (blue), ITC  
743 (violet), and TFP (red) listed in separate columns for different latency ranges: non-parametric  
744 permutation dependent/paired samples t-tests (sample size N=22) comparing A+T with AT+N.  
745 The p-values are reported at the cluster level (max sum) corrected for multiple comparisons over  
746 channels and time (and frequency for ITC and TFP) with an auxiliary uncorrected threshold of  
747  $p < 0.05$ . P-values in italics indicate a non-significant trend.

748

749 **Figure 3.** Evoked response potentials. Each row shows the audiotactile interaction for a  
750 particular level of AT asynchrony. (A) ERPs of the sum of the auditory and tactile (A+T; light  
751 blue), the sum of audiotactile plus null (AT+N; dark blue), and the audiotactile interaction, i.e.  
752 the difference ( $[A+T]-[AT+N]$ , orange). Green = auditory onset, pink = tactile onset. Shaded  
753 grey areas indicate the timing of significant AT interactions at  $p < 0.05$  corrected at the cluster  
754 level for multiple comparisons across electrodes and time points within a 500 ms window  
755 starting with the second stimulus and limited by the black dashed line. (B) Topographies of the  
756 sums: A+T, AT+N, and  $(A+T)-(AT+N)$  for time windows of significant AT interactions. The  
757 time windows written in orange are relative to the onset of the second stimulus. A black star over  
758 an electrode indicates that it is part of a significant cluster.

759

760 **Figure 4.** Inter-trial coherence. Each row shows the audiotactile interaction in the ITC for a  
761 particular level of AT asynchrony, plus the unisensory conditions. (A) ITC of the sum of the  
762 auditory and tactile (A+T; light blue), the sum of audiotactile plus null (AT+N; dark blue), and  
763 the audiotactile interaction, i.e. the difference ( $[A+T]-[AT+N]$ , orange). The bottom row shows  
764 the Null (grey), Tactile (pink), and Auditory (green) conditions. Green = auditory onset, pink =  
765 tactile onset. Shaded grey areas indicate the timing of significant AT interactions at  $p < 0.05$   
766 corrected at the cluster level for multiple comparisons across electrodes, frequency, and time  
767 points within a 1200 ms window starting with the second stimulus and limited by the black  
768 dashed line. (B) Topographies of the sums: A+T, AT+N, and  $(A+T)-(AT+N)$  for time windows  
769 of significant AT interactions. The time windows written in orange are relative to the onset of the  
770 second stimulus. A black star over an electrode indicates that it is part of a significant cluster.

771  
772 **Figure 5.** Time-frequency power. Each row shows the audiotactile interaction for a particular  
773 level of AT asynchrony. (A) Theta and (B) Alpha/Beta power of the sum of the auditory and  
774 tactile (A+T; light blue), the sum of audiotactile plus null (AT+N; dark blue), and the  
775 audiotactile interaction, i.e. the difference ( $[A+T]-[AT+N]$ , orange). The bottom row shows the  
776 null (grey), tactile (pink), and auditory (green) condition. Green = auditory onset, pink = tactile  
777 onset. Shaded grey areas indicate the timing of significant AT interactions at  $p < 0.05$  corrected  
778 at the cluster level for multiple comparisons across electrodes, frequency, and time points within  
779 a 1200 ms window starting with the second stimulus and limited by the black dashed line. (C)  
780 Topographies of the sums: A+T, AT+N, and  $(A+T)-(AT+N)$  for time windows of significant AT  
781 interactions, arranged in the same way as in Figures 3 and 4. The time windows written in orange  
782 are relative to the onset of the second stimulus. A black star over an electrode indicates that it is  
783 part of a significant cluster.

784  
785 **Figure 6:** Summary of six audiotactile interactions (rows a-f) for ERP, ITC, and TFP across the  
786 seven asynchrony levels. *Left:* Topographies of ERP, ITC, or TFP (as indicated), centred around  
787 a post-stimulus time (as indicated  $\pm 20$  ms), for a particular AT asynchrony level (as indicated in  
788 orange). *Right:* Line plots showing ERP, ITC, or TFP of the sum of the auditory and tactile  
789 (A+T; light blue), the sum of audiotactile plus null (AT+N; dark blue), and the audiotactile  
790 interaction, i.e. the difference ( $[A+T]-[AT+N]$ ; orange) as a function of AT asynchrony: 0,  $\pm 20$ ,  
791  $\pm 70$ , and  $\pm 500$  ms. The values are averaged across the representative electrodes highlighted in  
792 the topographies (left) and within a 40 ms time window centred on the latencies specified  
793 alongside the corresponding topographies. For interpretational purposes, the labels ‘U’ and ‘70’

- 794 indicate via colour coding whether 'A+T' and 'AT+N' (blue) or the AT interaction (orange)
- 795 follow a U-shape function (= U) or are selective for  $\pm 70$  ms asynchrony (= 70).

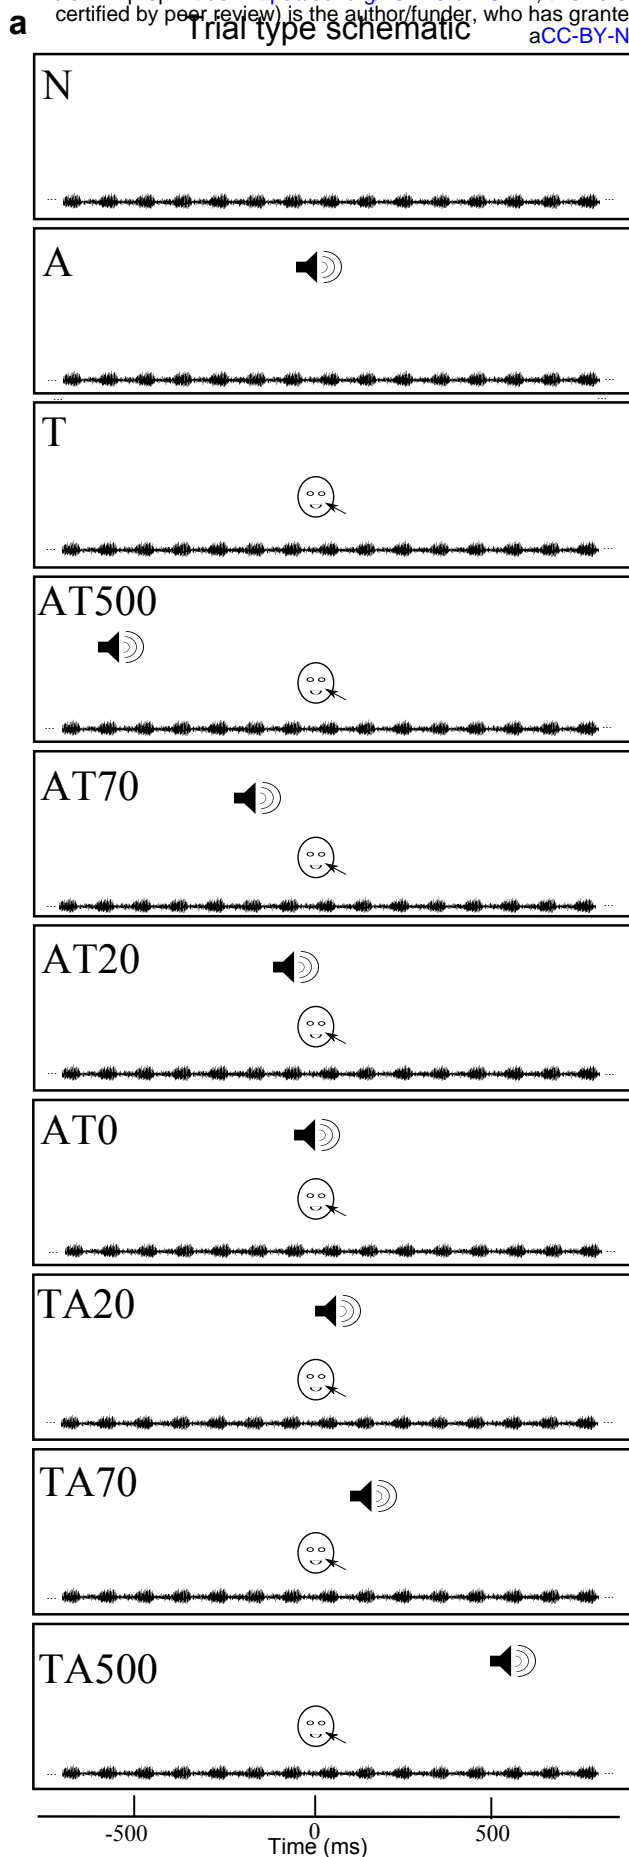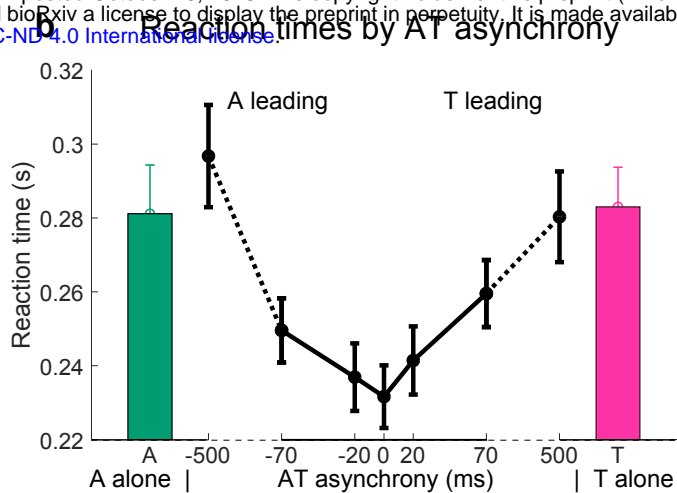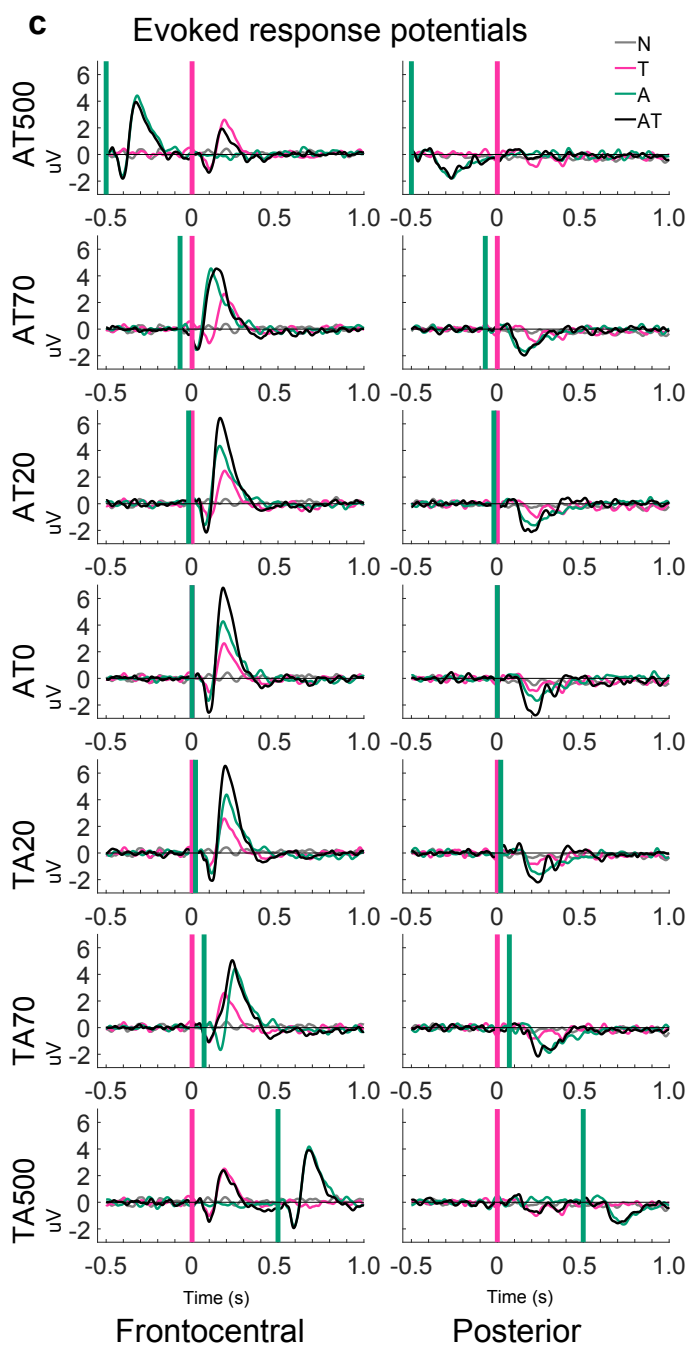

| MSI effects | Behaviour:        | Neural Post-stimulus Latency: |                                                                                   |                          |                                 |
|-------------|-------------------|-------------------------------|-----------------------------------------------------------------------------------|--------------------------|---------------------------------|
|             |                   | RTE                           | ~125 ms                                                                           | ~200 ms                  | ~400 ms                         |
| AT500       | p=0.001<br>t=9.9  |                               |                                                                                   |                          |                                 |
| AT70        | p=1.2e-5<br>t=5.7 |                               | ERP 120-270 ms (p=0.010)<br>θ ITC 0-260 ms (p=0.037)<br>θ TFP 90-640 ms (p=0.01)  |                          | β TFP 1030-1150 ms (p=0.042)    |
| AT20        | p=7.2e-8<br>t=8.1 | ERP 40-100 ms (p=0.072)       | θ TFP 0-470 ms (p=0.049)                                                          | ERP 370-420 ms (p=0.022) | α & β TFP 700-1000 ms (p=0.027) |
| AT0         | p=1.1e-7<br>t=7.8 | ERP 70-170 ms (p=0.017)       |                                                                                   | ERP 370-420 ms (p=0.28)  | α & β TFP 840-1140 ms (p=0.017) |
| TA20        | p=2.1e-8<br>t=8.7 |                               |                                                                                   | ERP 340-400 ms (p=0.03)  |                                 |
| TA70        | p=8.8e-5<br>t=4.8 |                               | ERP 140-220 ms (p=0.007)<br>θ ITC 0-490 ms (p=0.0005)<br>θ TFP 0-480 ms (p=0.005) |                          | α/β TFP 870-1200 ms (p=0.023)   |
| TA500       |                   |                               |                                                                                   |                          |                                 |

bioRxiv preprint doi: <https://doi.org/10.1101/446112>; this version posted October 18, 2018. The copyright holder for this preprint (which was not certified by peer review) is the author/funder, who has granted bioRxiv a license to display the preprint in perpetuity. It is made available under aCC-BY-NC-ND 4.0 International license.

### ERP: AT interactions as a function of AT asynchrony

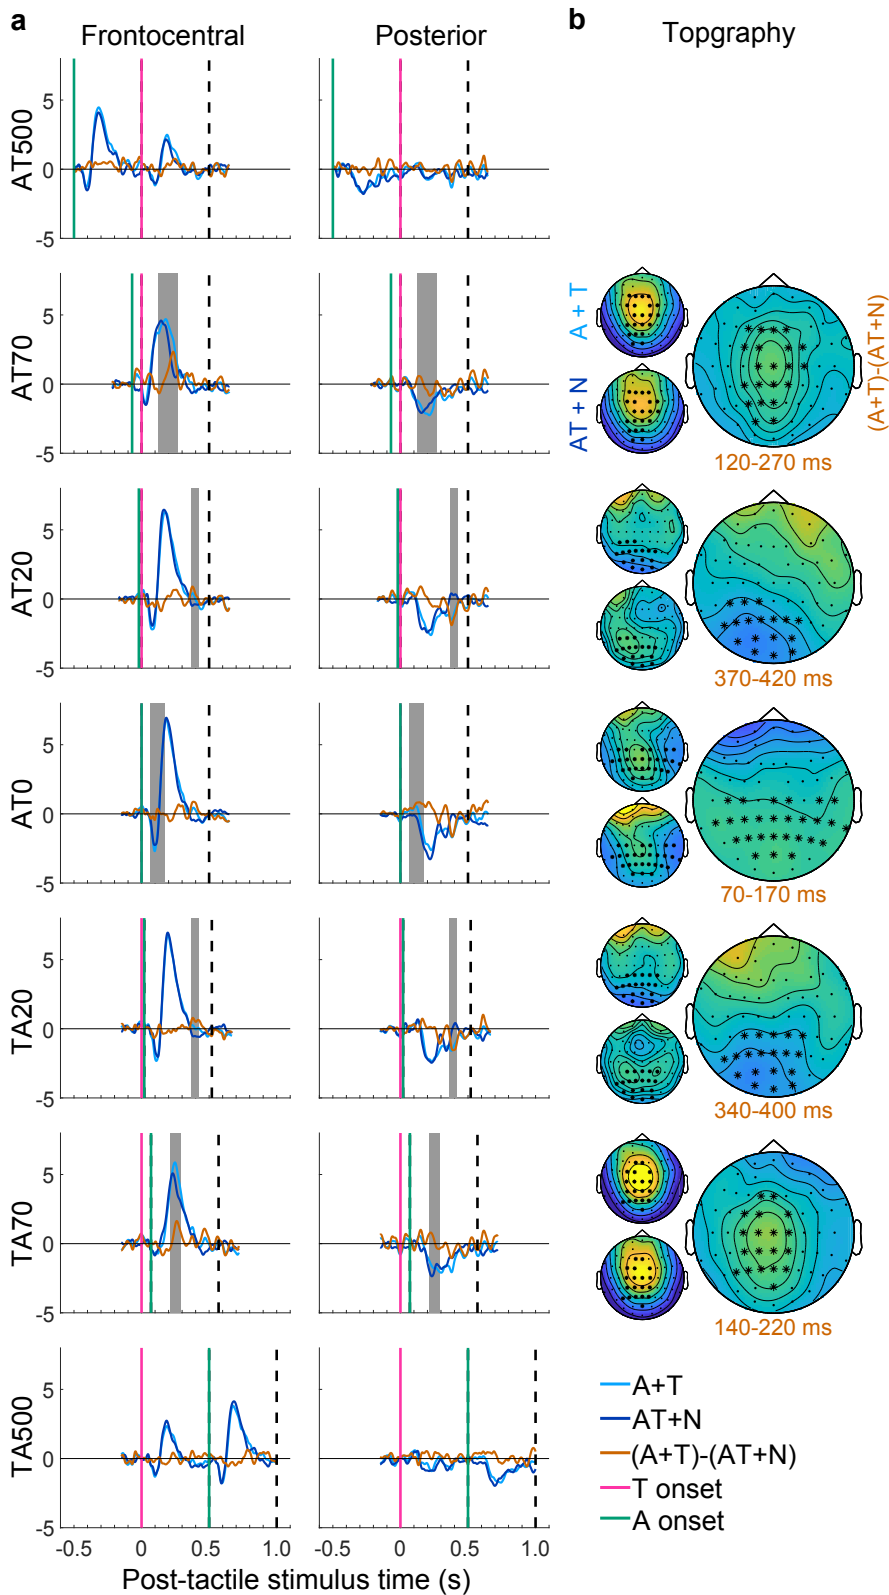

## Inter-trial coherence (Theta; 4-8 Hz): AT interactions as a function of AT asynchrony

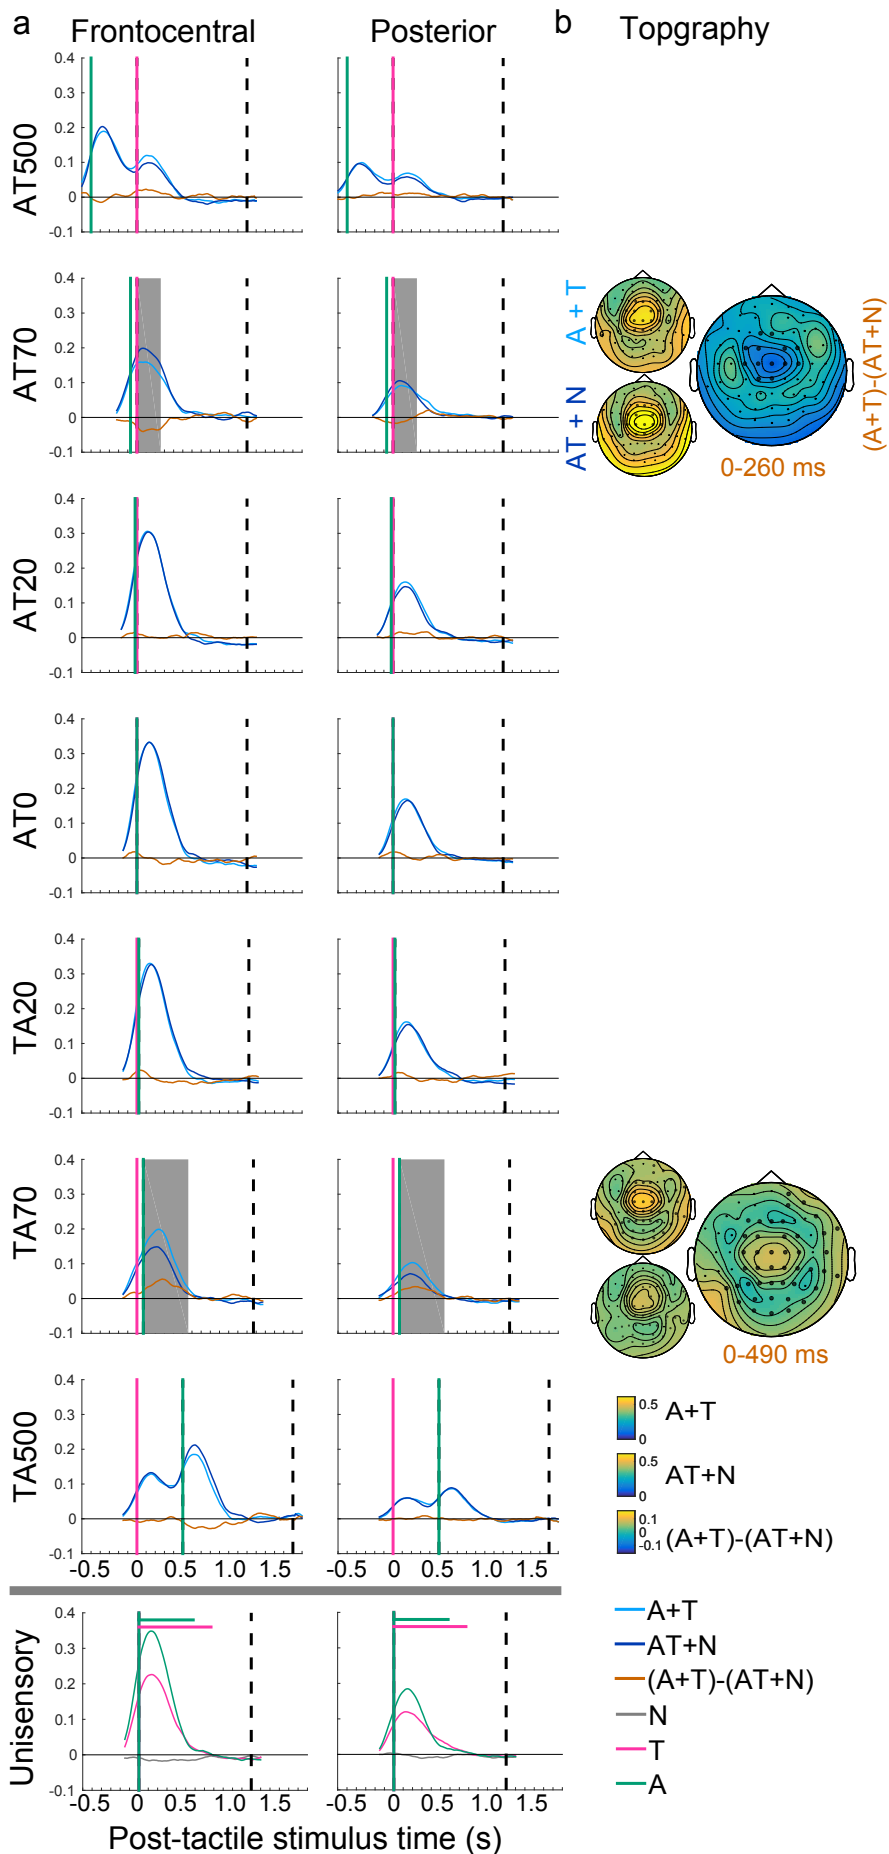



### Time-frequency power: AT interactions as a function of AT asynchrony

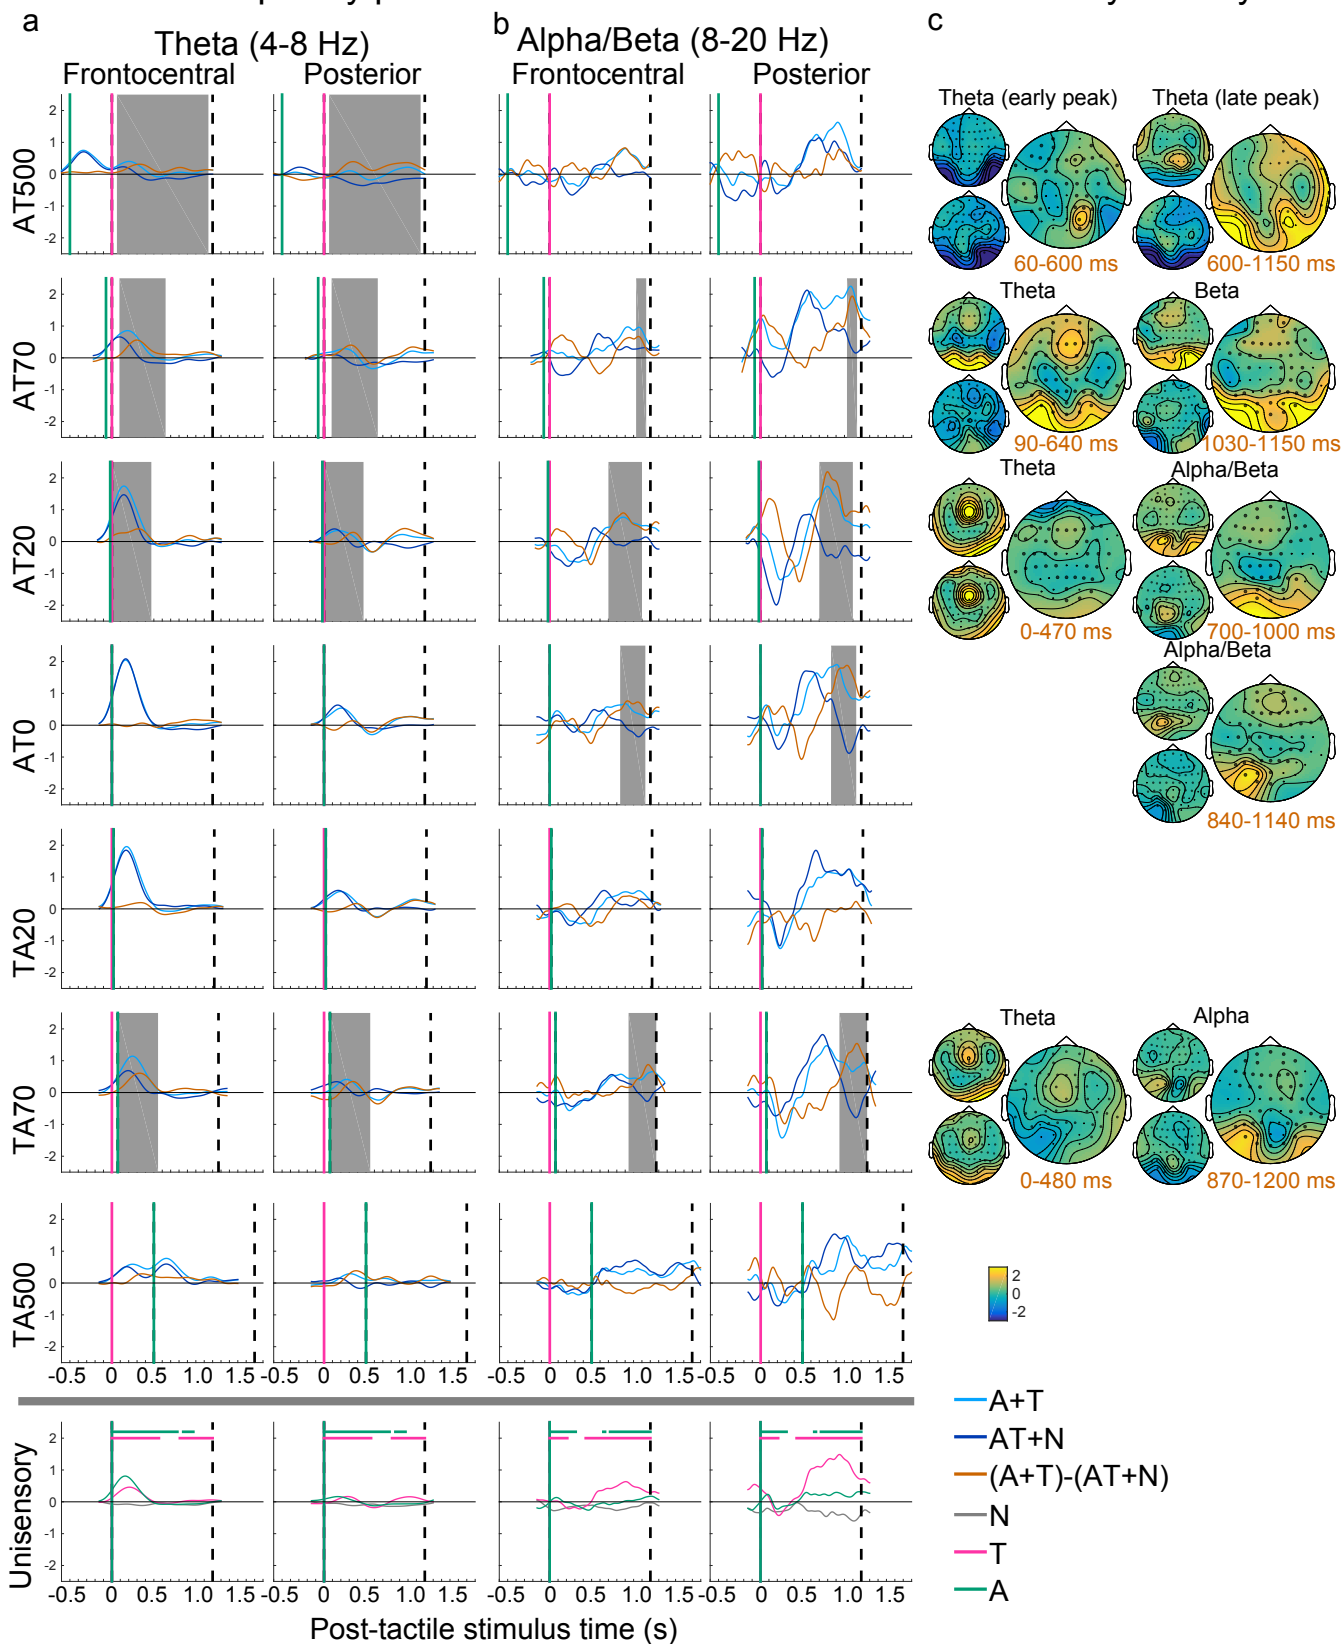

## Summary of audiotactile interactions

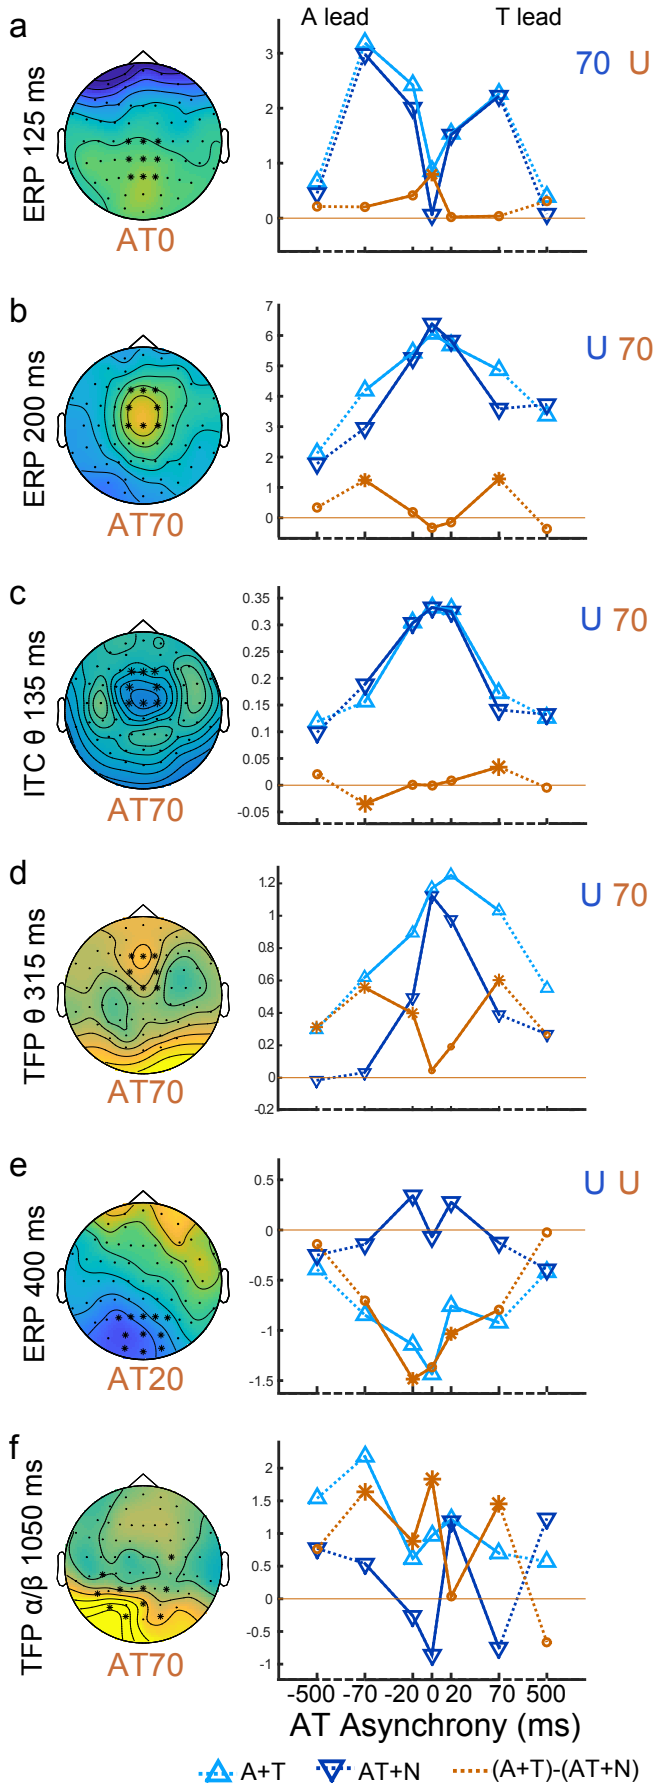

Source: https://www.biorxiv.org/content/10.1101/446112v1.full.pdf
